# Supplementary material
Source: PubMed Central journal article supplement (PMC3449380)
Supplement: 97320630008711S1.pdf [file 97320630008711S1.pdf]

## Supplementary material:

**Table 1:** The structural variation present in *D. melanogaster*, *A. tabida* and *B. malayi* shows that the number of random coils, helices and turns is greater in *B. malayi* than in *D. melanogaster* or *A. tabida*.

|                      | <i>D.melanogaster</i> | <i>A.tabida</i> | <i>B.malayi</i> |
|----------------------|-----------------------|-----------------|-----------------|
| $\alpha$ -Helix (Hh) | 50 is 21.10%          | 27 is 13.78%    | 74 is 26.33%    |
| Extended strand(Ee)  | 60 is 25.32%          | 65 is 33.16%    | 56 is 19.93%    |
| $\beta$ -turn(Tt)    | 14 is 5.91%           | 15 is 7.65%     | 21 is 7.47%     |
| Random coils (Cc)    | 113 is 47.68%         | 89 is 45.41%    | 130 is 46.26%   |

**Table 2:** The active site amino acids present in WSP *D. melanogaster*, *B. malayi* and *A. tabida*

| WSP in <i>D.melanogaster</i> | WSP in <i>A.tabida</i> | WSP in <i>B.Malayi</i> |
|------------------------------|------------------------|------------------------|
| ILE-74, GLY 76, PHE 80,      | ASP74, ASN77, ALA 80,  | TYR158, TYR159,        |
| TYR82, LYS83, ASP85,         | VAL83, SER87, LEU89,   | TRP160, LYS161,        |
| PHE 108, ILE 114, ASP116,    | ALA113, ALA114,        | ASN162, ASP163,        |
| THR119                       | ILE116, VAL124         | SER166, TYR170,        |
|                              |                        | LYS195.                |

**Table 3:** The biophysical properties of WSP in *D. melanogaster*, *B. malayi* and *A. tabida*. The arrangement of C-terminal and N-Terminal regions in WSP complex.

|                              | N-Terminal | C-Terminal |
|------------------------------|------------|------------|
| WSP in <i>D.melanogaster</i> | 80.747 A°  | 72.724 A°  |
| WSP in <i>A.tabida</i>       | 80.747 A°  | 77.313 A°  |
| WSP in <i>B.malayi</i>       | 80.747 A°  | 69.199 A°  |
